# Supplementary material for: Exploitation of the multitarget role of new ferulic and gallic acid derivatives in oxidative stress-related Alzheimer's disease therapies: design, synthesis and bioevaluation
Source: Royal Society of Chemistry journal article supplement (doi:10.1039/d4ra00766b), 2024-01-01
Supplement: d4ra00766b1.pdf [file d4ra00766b1.pdf]

## Supporting Information

### **Exploitation of multitarget role of new ferulic and gallic acid derivatives in oxidative stress-related Alzheimer's disease Therapies: Design, synthesis and bioevaluation**

Fahad Hussain <sup>a</sup>, Ayesha Tahir <sup>a</sup>, Muhammad Saeed Jan <sup>b</sup>, Noor Fatima <sup>a</sup>, Abdul Sadiq <sup>c</sup>, and Umer Rashid <sup>\*a</sup>

<sup>a</sup> Department of Chemistry, COMSATS University Islamabad, Abbottabad Campus, 22060 Abbottabad, Pakistan.

<sup>b</sup> Department of Pharmacy, Bacha Khan University, 24420, Charsadda, KPK, Pakistan.

<sup>c</sup> Department of Pharmacy, University of Malakand, 18000 Chakdara, KP, Pakistan.

Corresponding author: E-mail: [umerrashid@cuiatd.edu.pk](mailto:umerrashid@cuiatd.edu.pk)

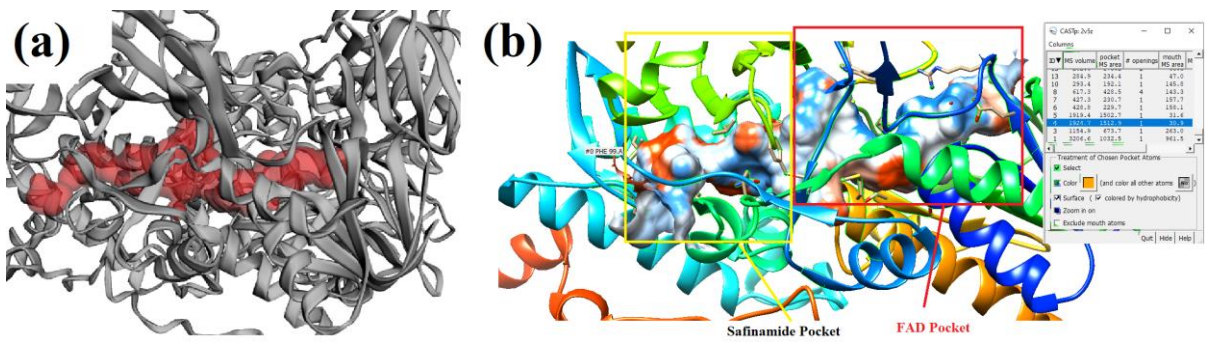

**Figure S-1:** (a) Shape and binding pocket volume of MAO-B (2V5Z) generated *via* Computed Atlas of Surface Topography of proteins (CASTp) online server (b) 3D modelled ribbon diagram with co-crystallized ligand (surface diagram) obtained *via* MOE software

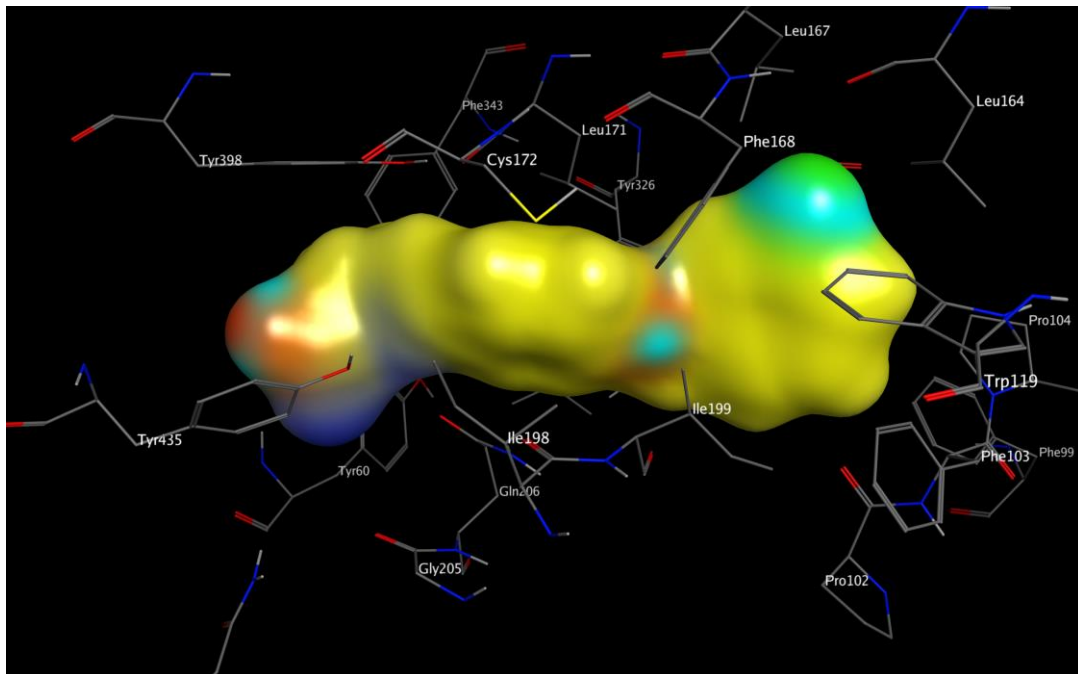

**Figure S-2:** Shape and binding pocket of MAO-B (2V5Z) with co-crystallized ligand safinamide (Surface diagram) generated *via* MOE

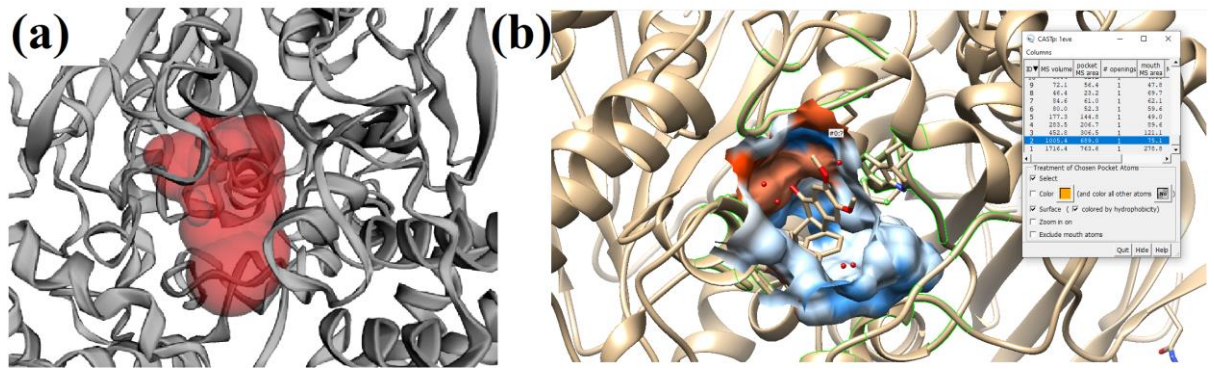

**Figure S-3:** (a) Shape and binding pocket volume of *TcAChE* (1EVE) generated *via* CASTp online server (b) 3D modelled ribbon diagram with co-crystallized ligand (surface diagram) obtained *via* MOE software

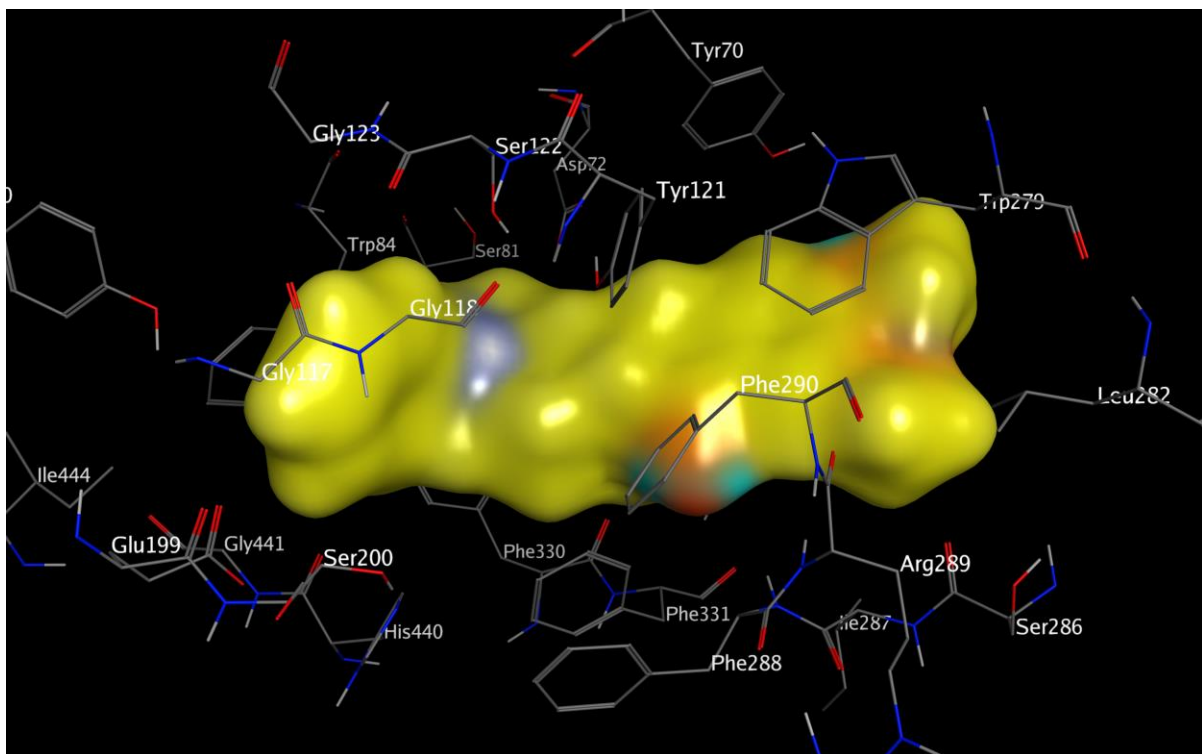

**Figure S-4:** Shape and binding pocket of *TcAChE* (1EVE) with co-crystallized ligand donepezil (Surface diagram) generated *via* MOE

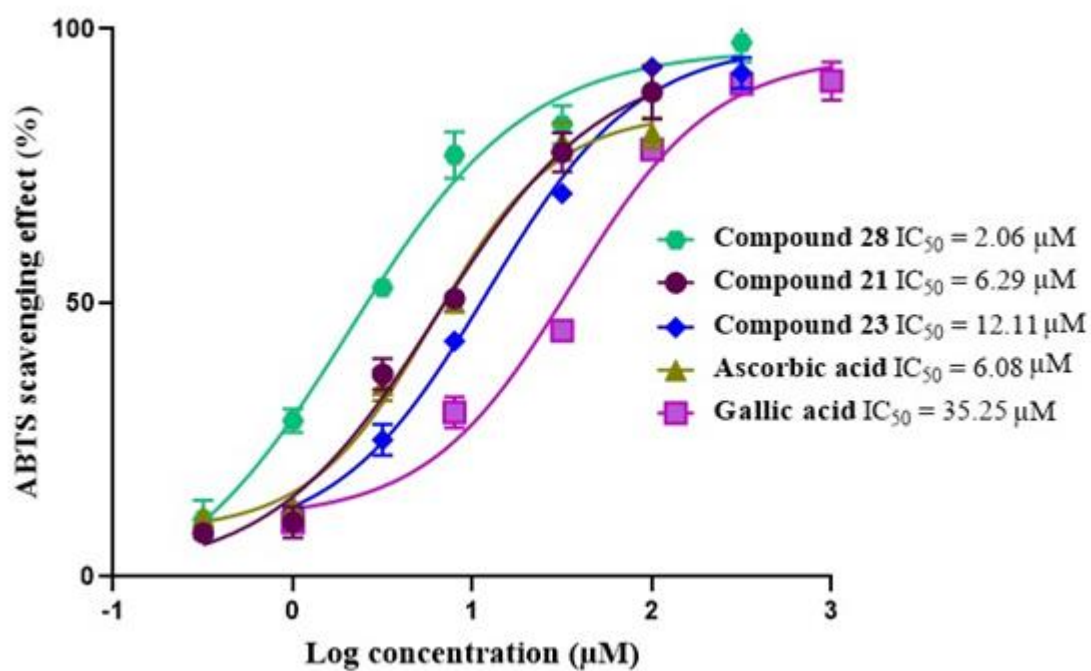

Figure S-5: Dose-response curve of synthesized compounds obtained from the percent ABTS scavenging effect and concentration values.

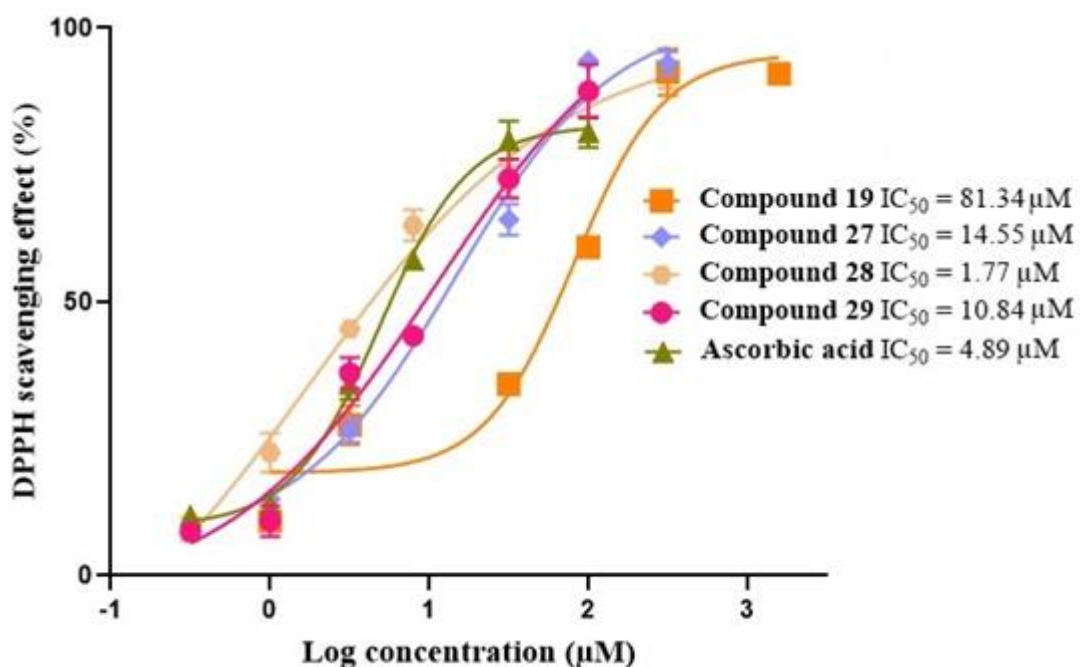

Figure S-6: Dose-response curve of synthesized compounds obtained from the percent DPPH scavenging effect and concentration values.

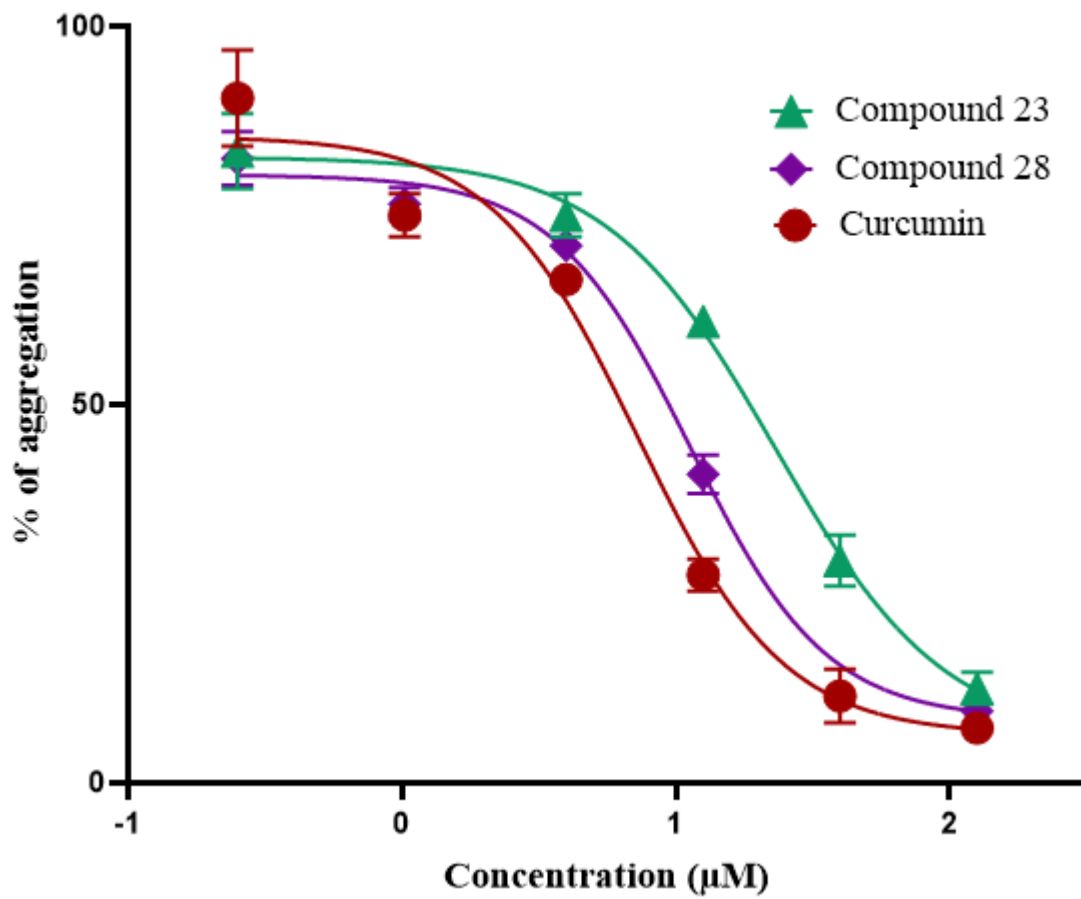

**Figure S-7:** Dose–response effect of inhibitors (**23**, **28**) and standard drug curcumin) from ThT assay on A $\beta$  aggregation.

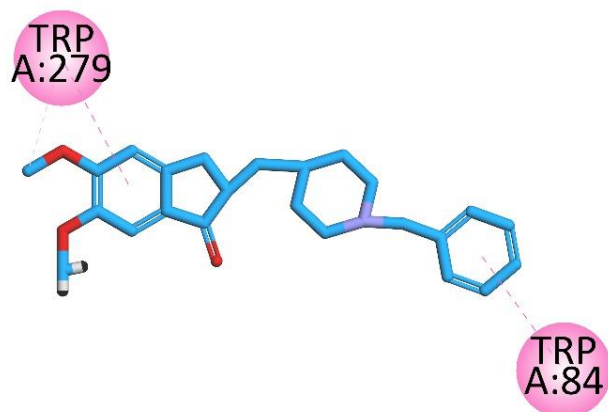

**Figure S-8:** 2D interaction plot of standard drug donepezil in the binding site of AChE (1EVE) modelled by using Discovery Studio visualizer

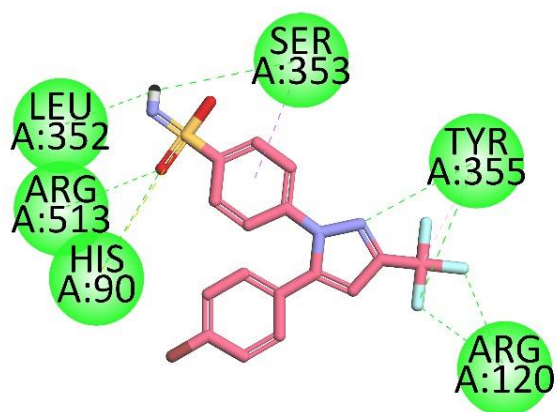

**Figure S-9:** 2D interaction plot of standard drug Celecoxib in the binding site of COX-2 (1CX2) modelled by using Discovery Studio visualizer

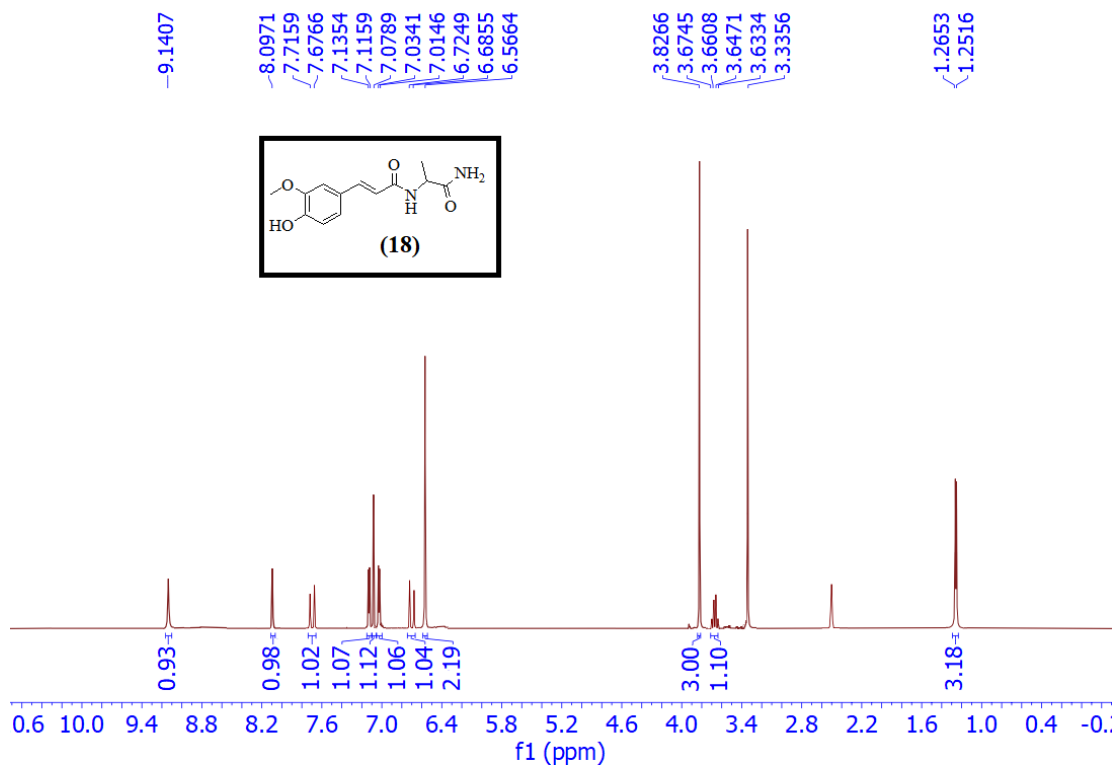

**Figure S-10:** <sup>1</sup>H NMR (400 MHz) spectrum of compound **18** in DMSO-*d*<sub>6</sub>

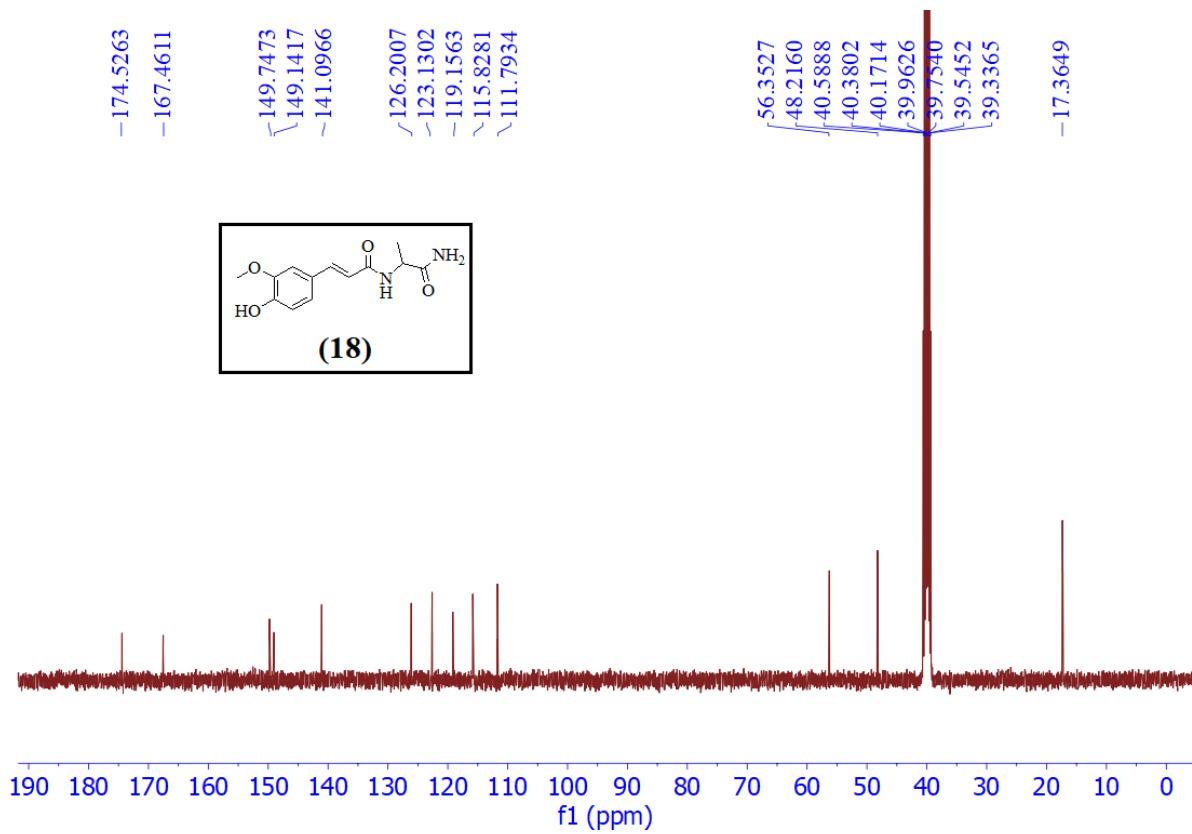

Figure S-11: <sup>13</sup>C NMR (100 MHz) spectrum of compound **18** in DMSO-*d*<sub>6</sub>

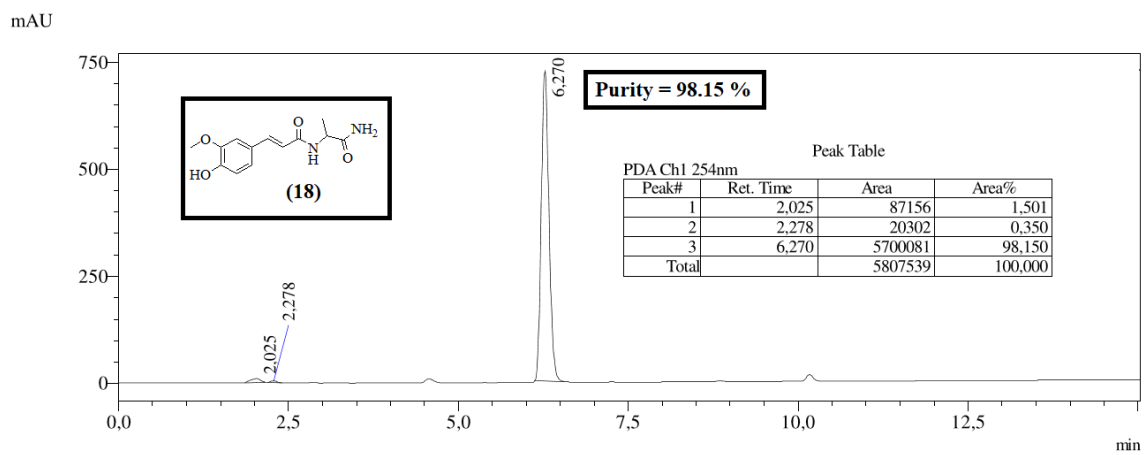

Figure S-12: HPLC Chromatogram of compound **18**



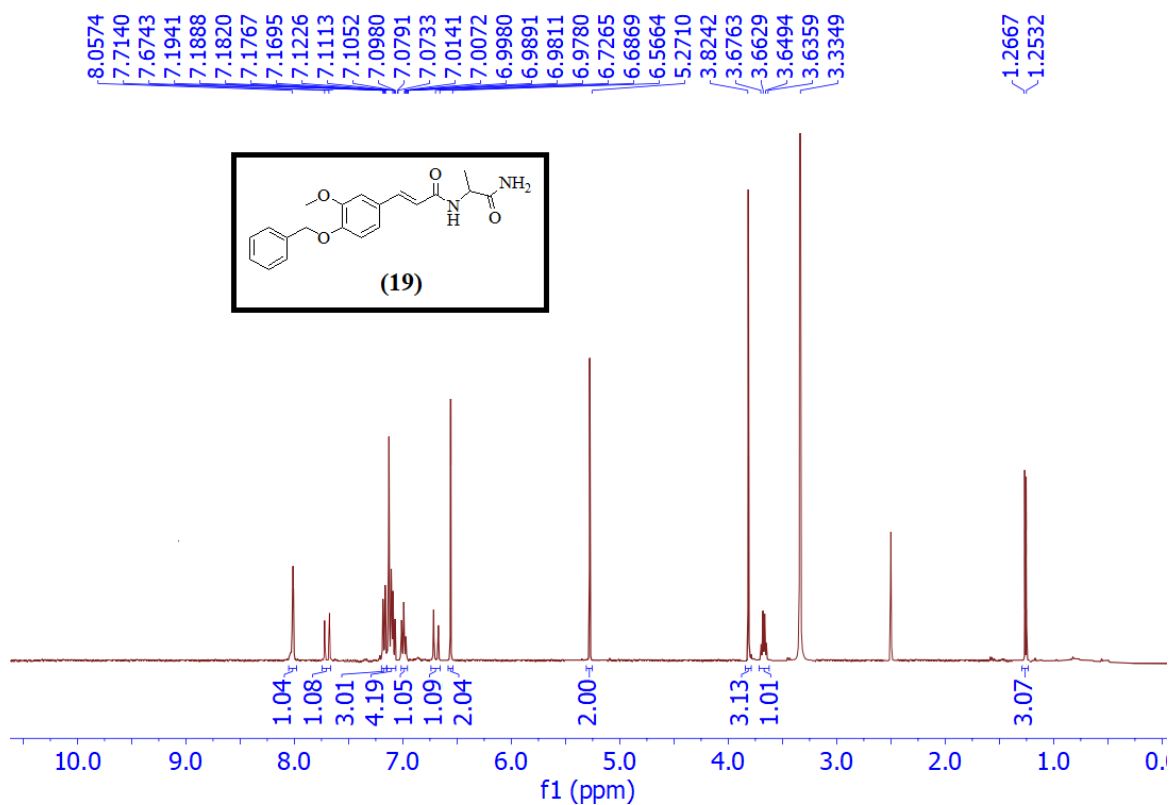

**Figure S-13:** <sup>1</sup>H NMR (400 MHz) spectrum of compound **19** in DMSO-*d*<sub>6</sub>

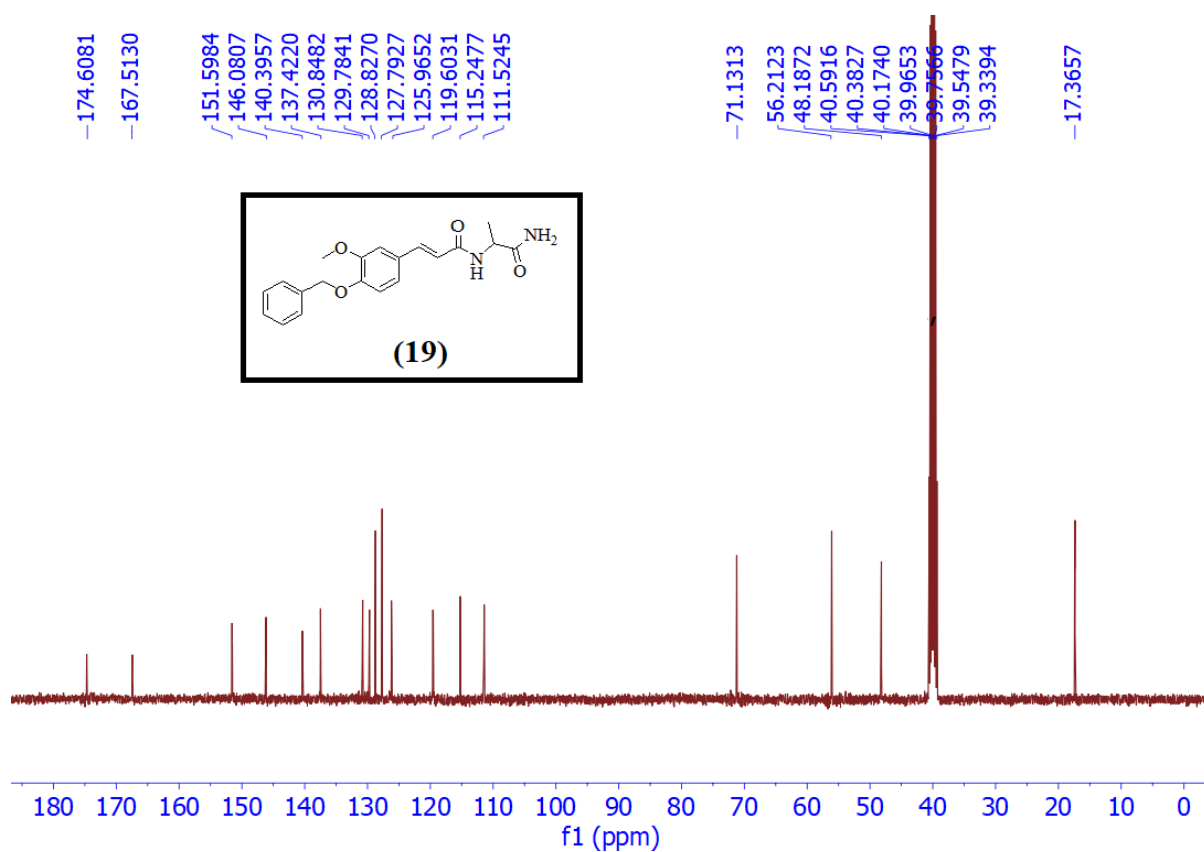

**Figure S-14:**  $^{13}\text{C}$  NMR (100 MHz) spectrum of compound **19** in  $\text{DMSO-}d_6$

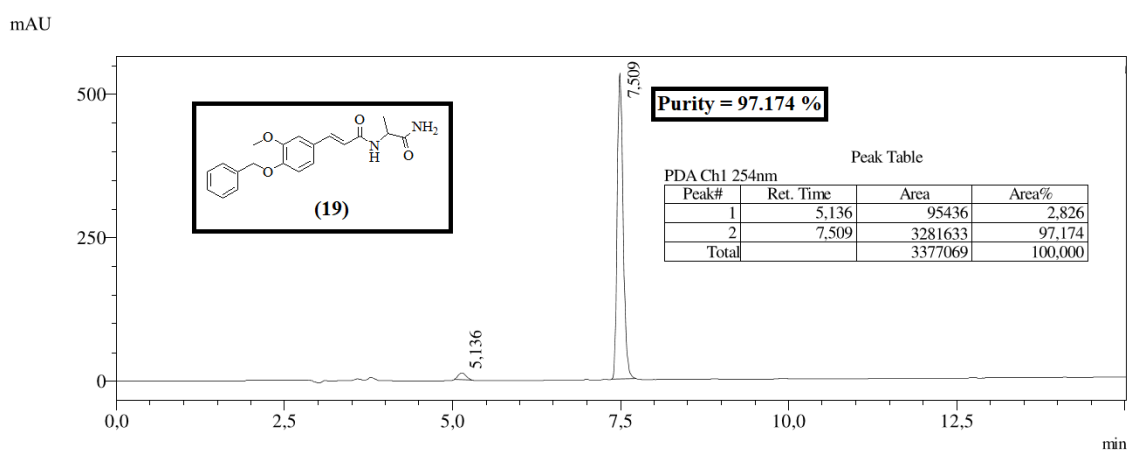

**Figure S-15:** HPLC Chromatogram of compound **19**

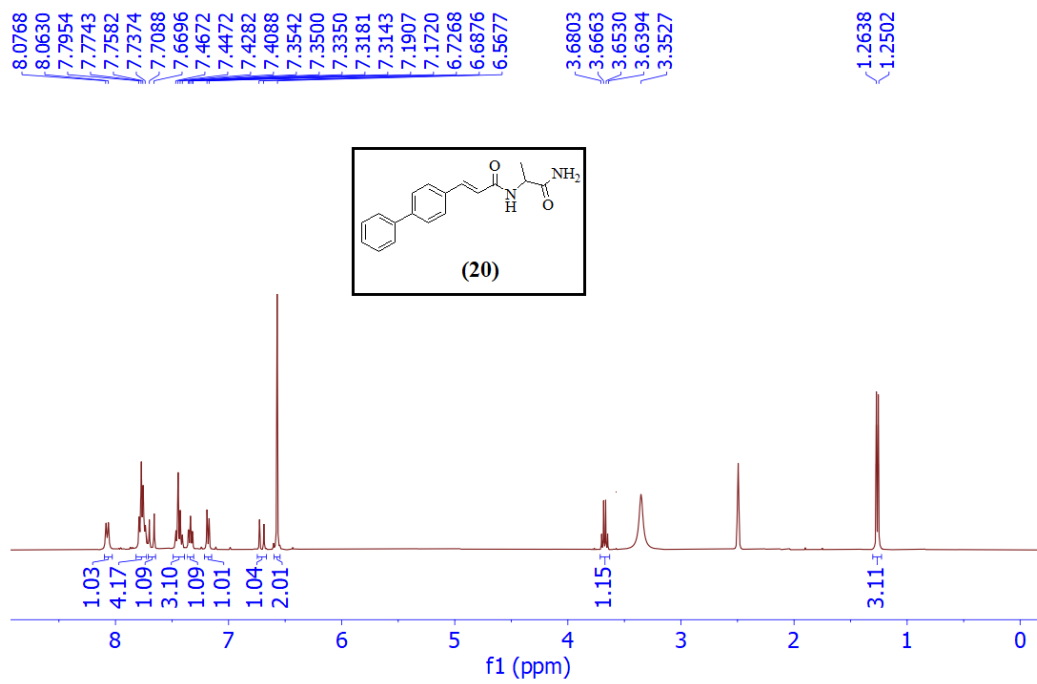

**Figure S-16:** <sup>1</sup>H NMR (400 MHz) spectrum of compound **20** in DMSO-*d*<sub>6</sub>

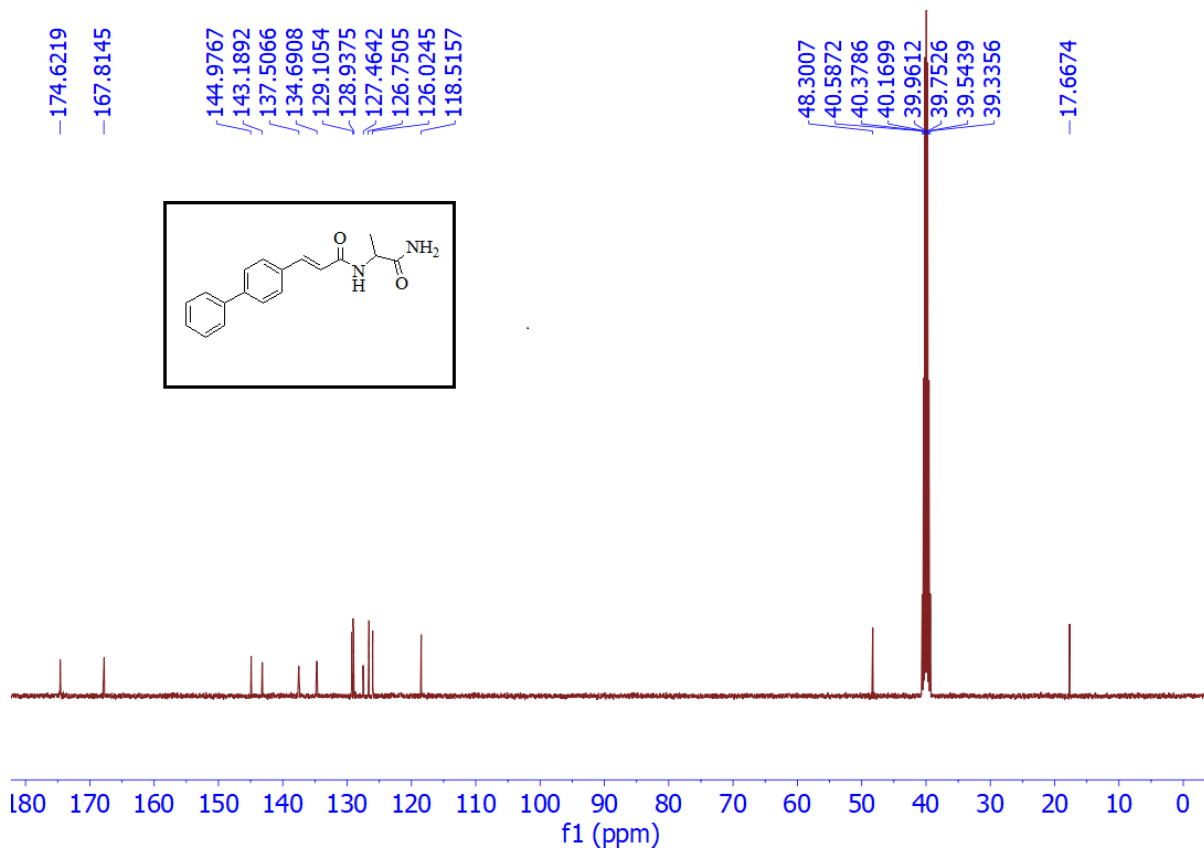

Figure S-17: <sup>13</sup>C NMR (100 MHz) spectrum of compound 20 in DMSO-*d*<sub>6</sub>

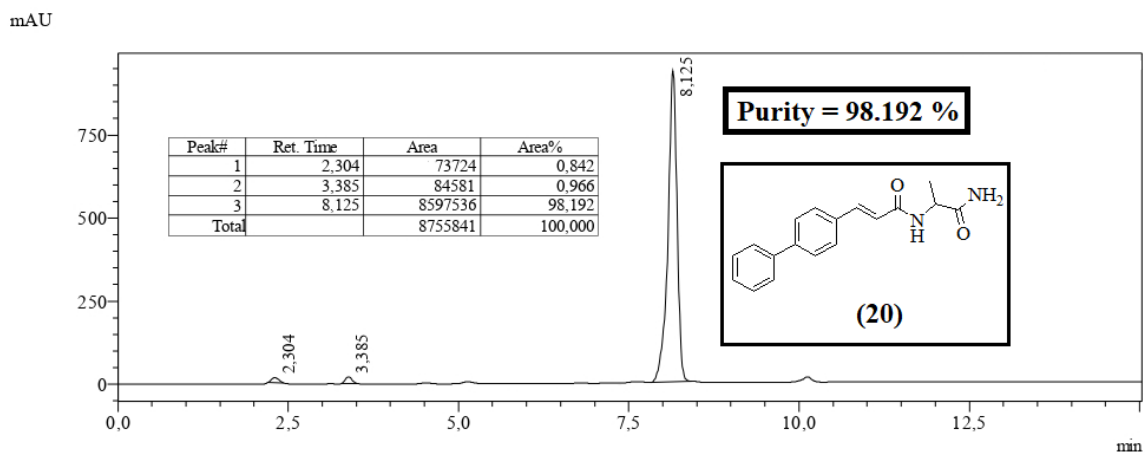

Figure S-18: HPLC Chromatogram of compound 20

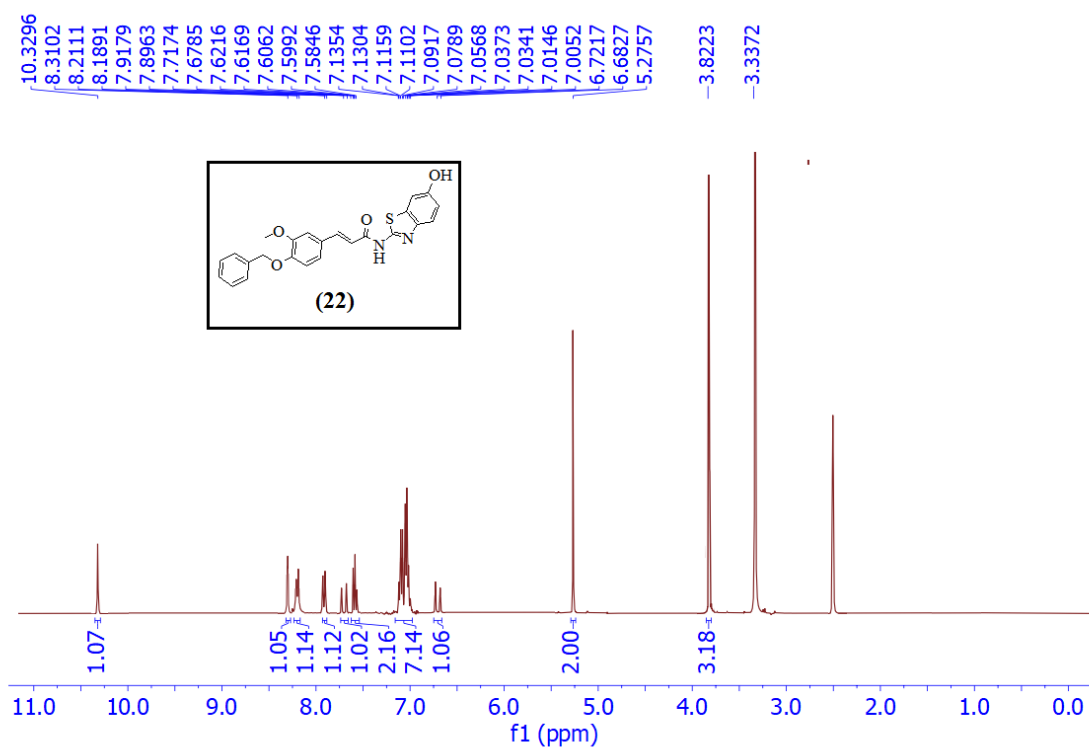

**Figure S-19:**  $^1\text{H NMR}$  (400 MHz) spectrum of compound **22** in  $\text{DMSO-}d_6$

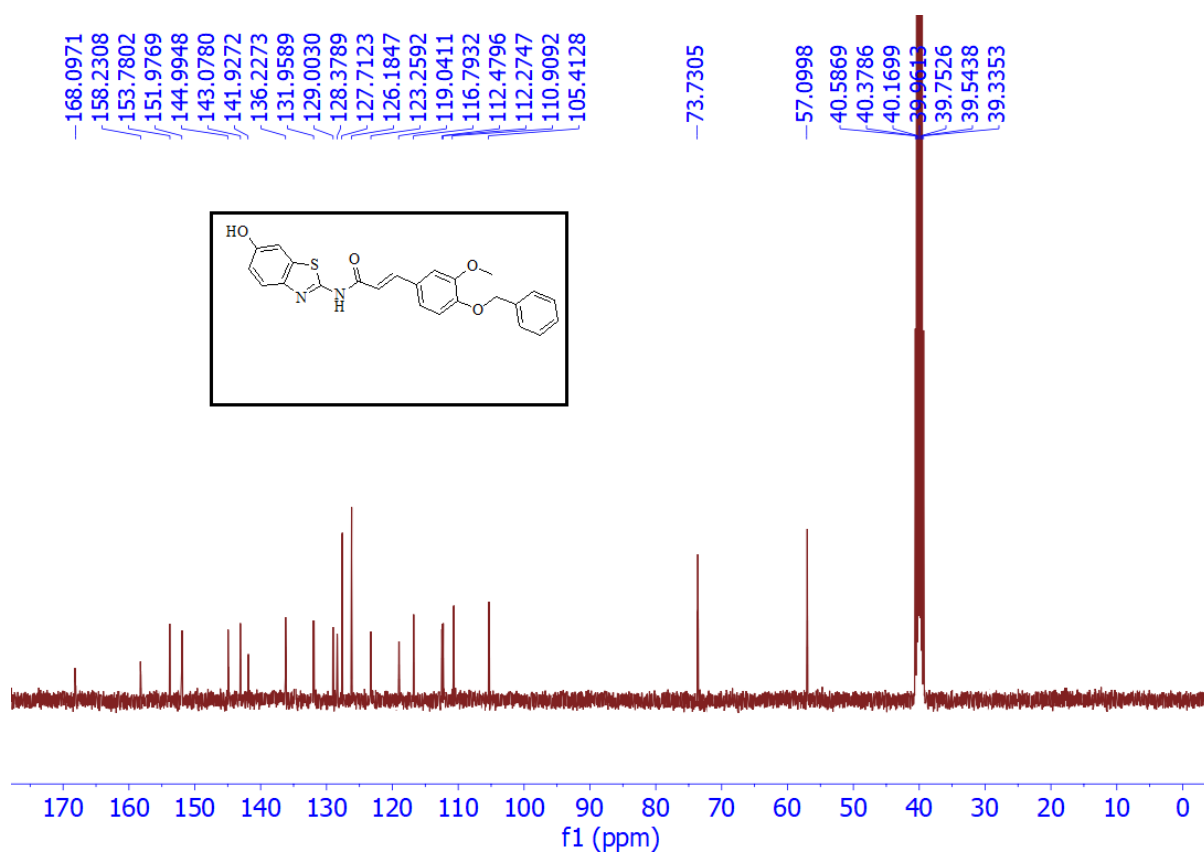

**Figure S-20:**  $^{13}\text{C}$  NMR (100 MHz) spectrum of compound **22** in  $\text{DMSO-}d_6$

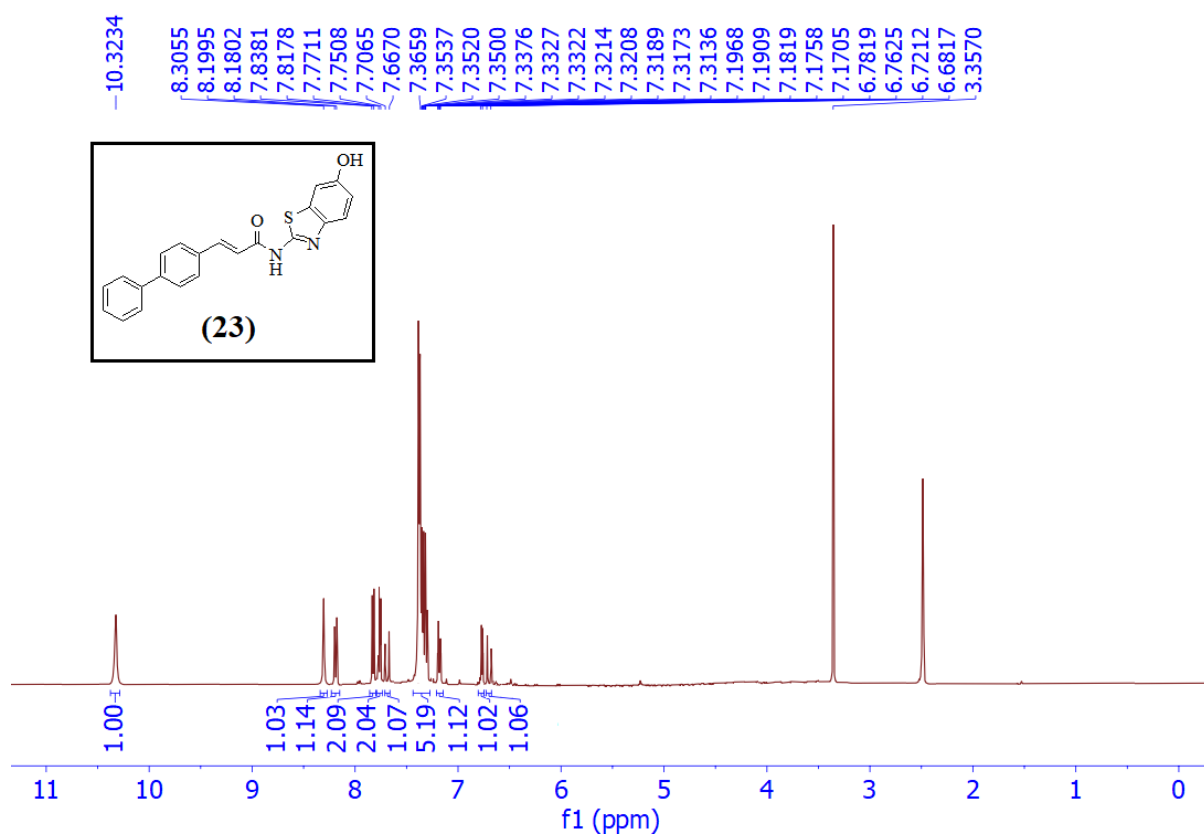

Figure S-21:  $^1\text{H}$  NMR (400 MHz) spectrum of compound **23** in  $\text{DMSO-}d_6$

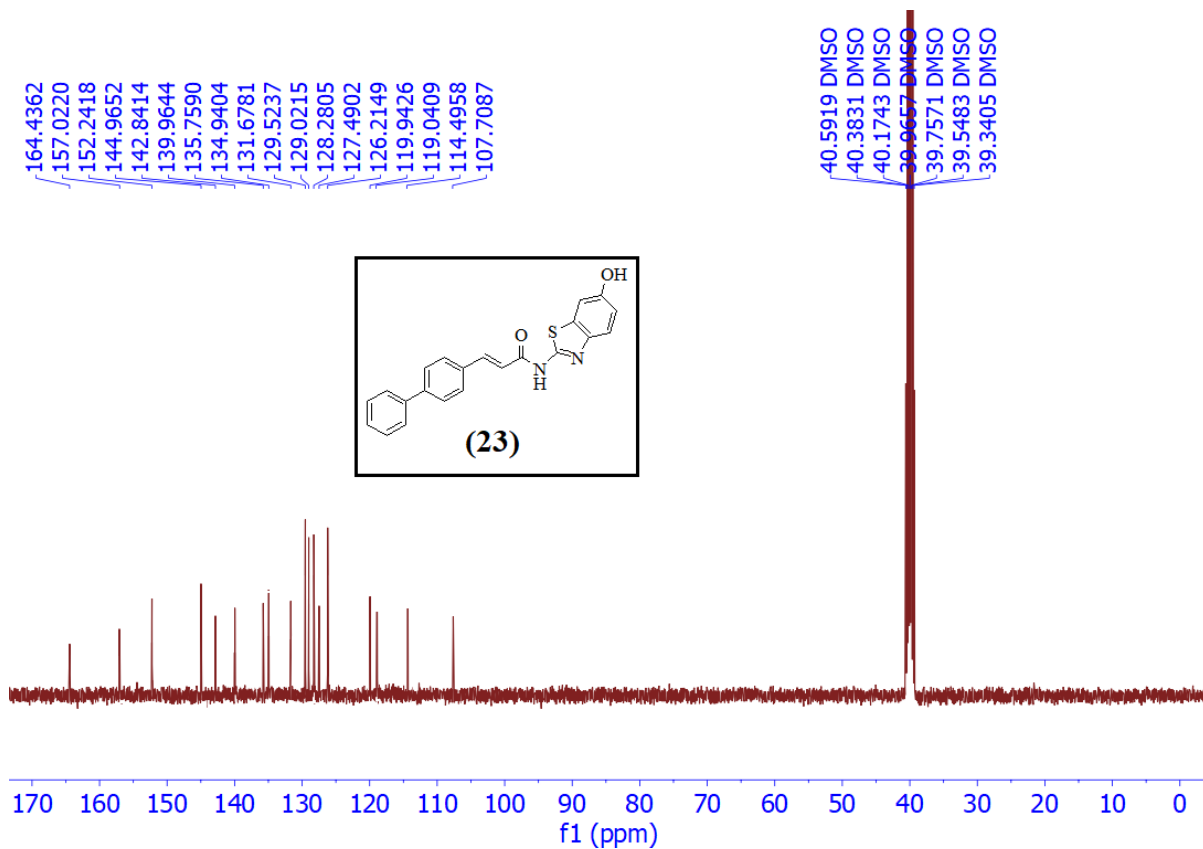

Figure S-22:  $^{13}\text{C}$  NMR (100 MHz) spectrum of compound **23** in  $\text{DMSO-}d_6$

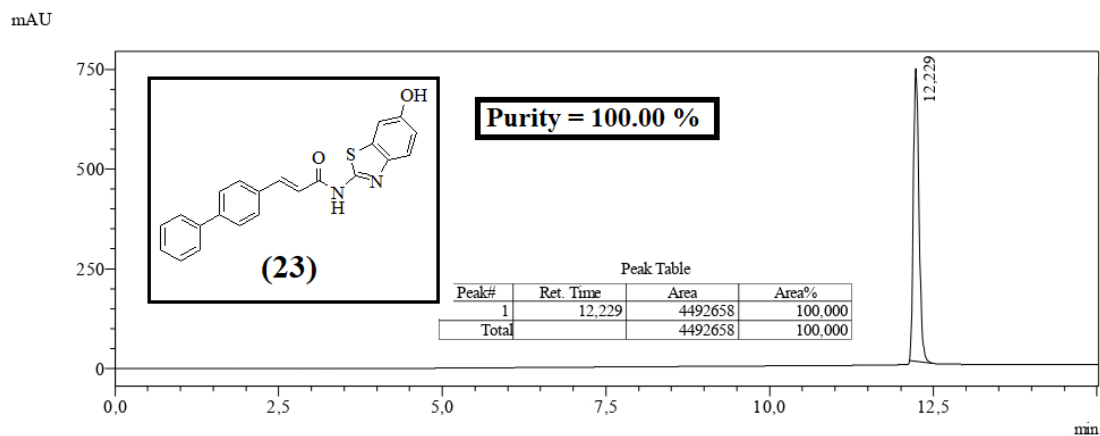

Figure S-23: HPLC Chromatogram of compound **23**



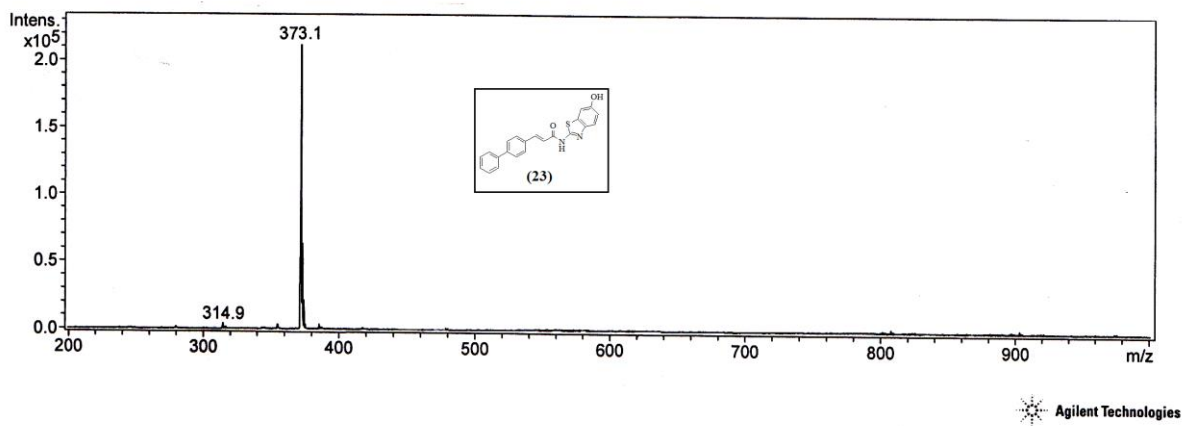

**Figure S-24:** LC-MS Chromatogram of compound **23**

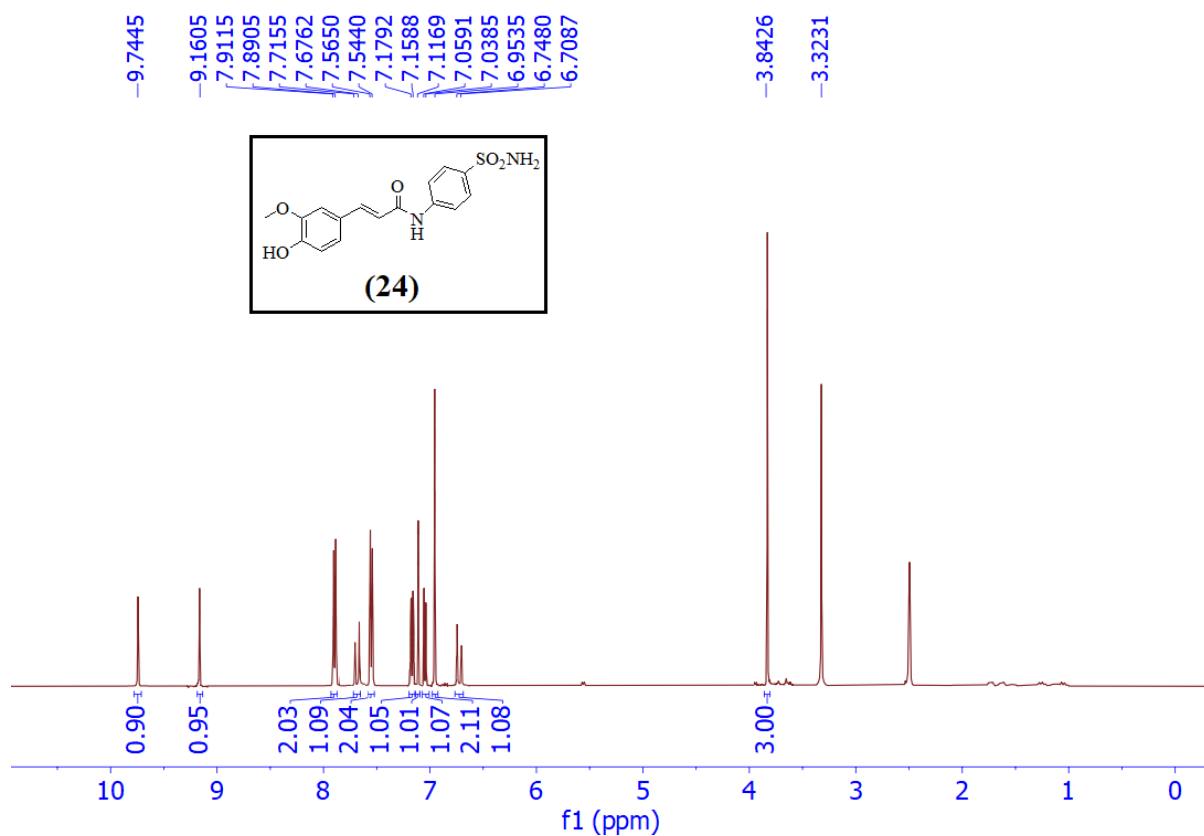

Figure S-25: <sup>1</sup>H NMR (400 MHz) spectrum of compound **24** in DMSO-*d*<sub>6</sub>

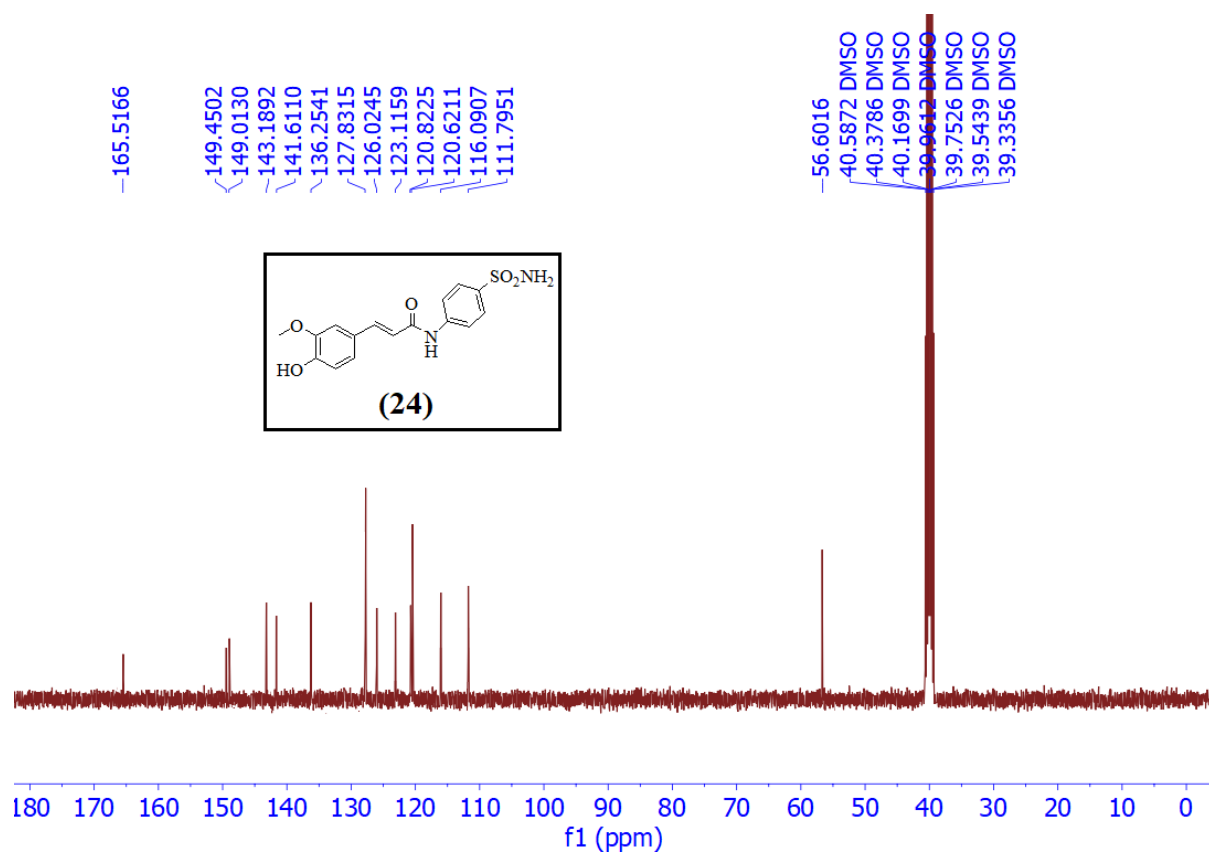

Figure S-26: <sup>13</sup>C NMR (100 MHz) spectrum of compound **24** in DMSO-*d*<sub>6</sub>

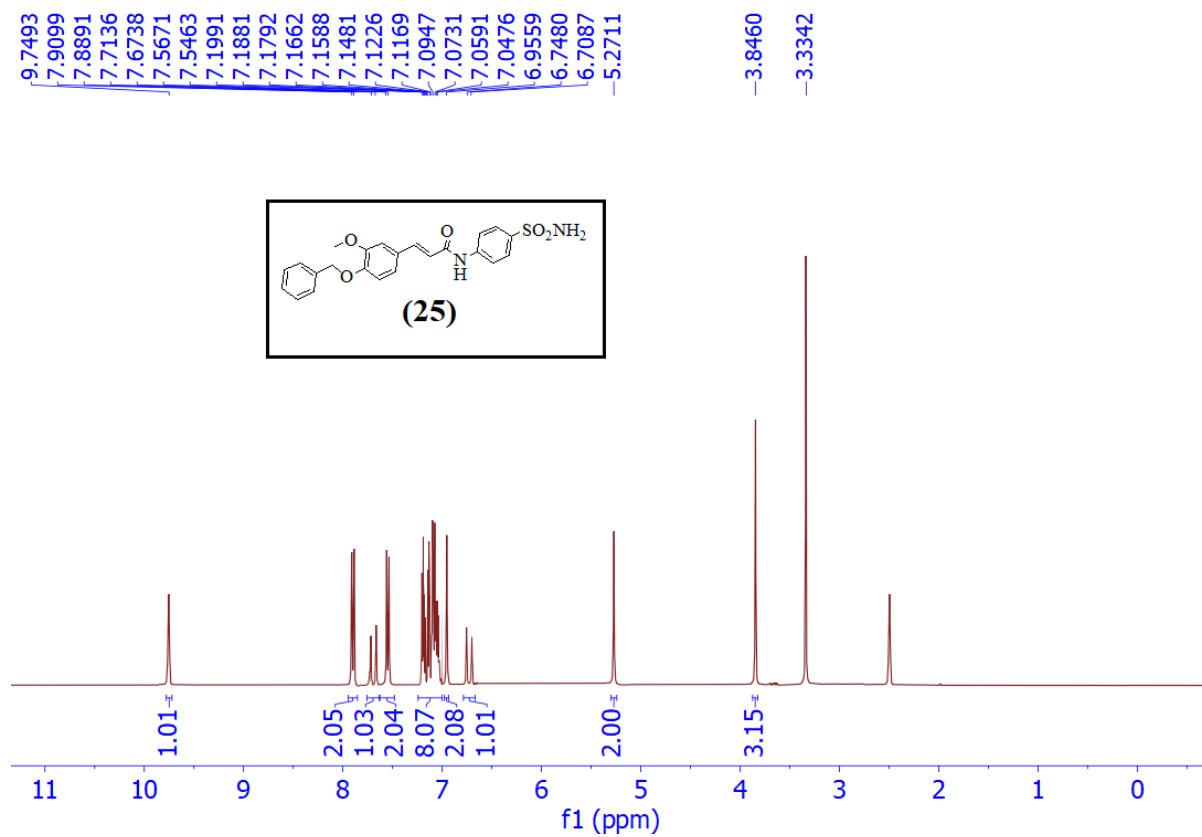

**Figure S-27:**  $^1\text{H NMR}$  (400 MHz) spectrum of compound **25** in  $\text{DMSO-}d_6$

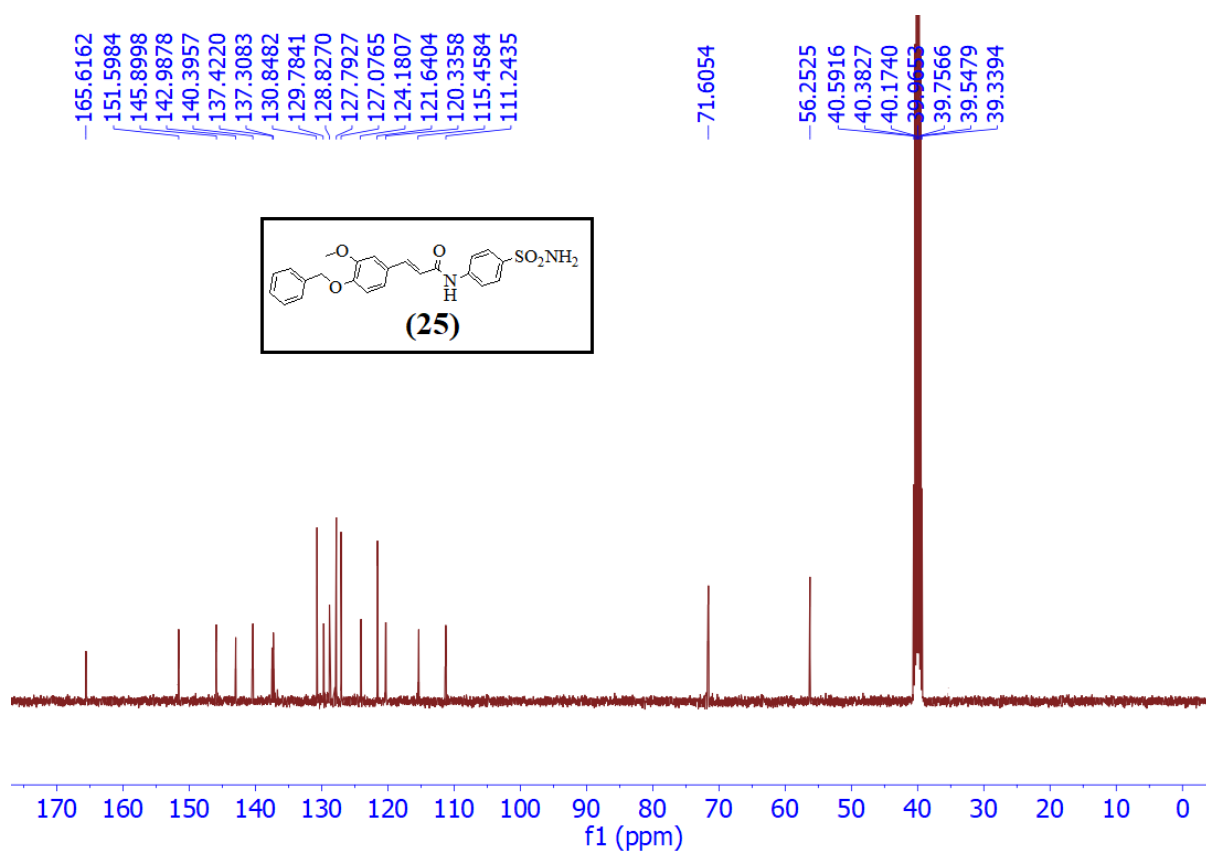

Figure S-28: <sup>13</sup>C NMR (100 MHz) spectrum of compound **(25)** in DMSO-*d*<sub>6</sub>

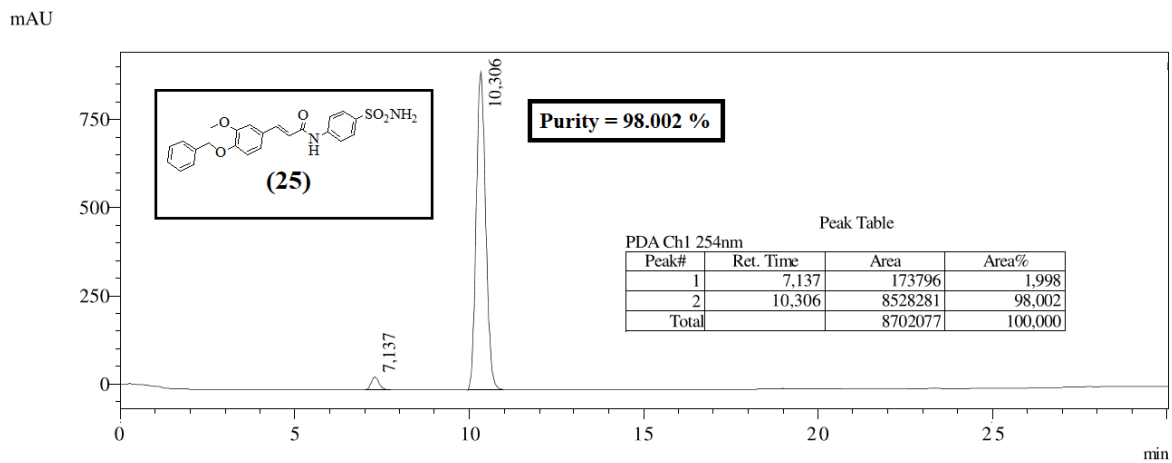

Figure S-29: HPLC Chromatogram of compound **(25)**

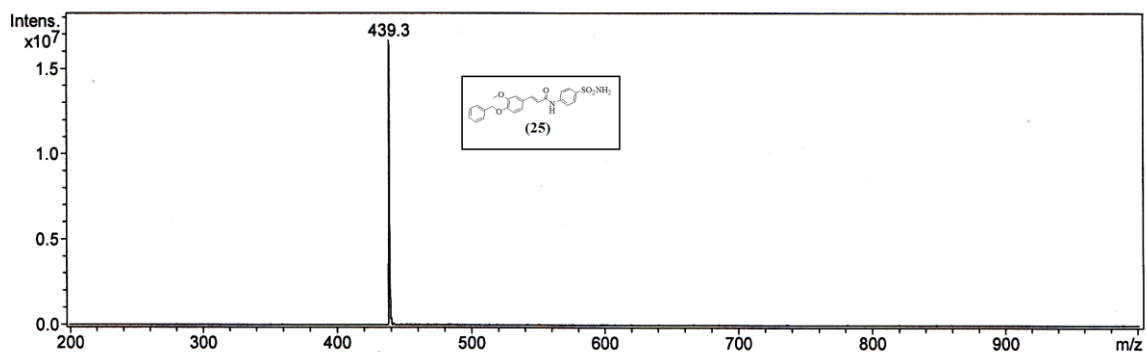

Agilent Technologies

Figure S-30: LC-MS Chromatogram of compound 25

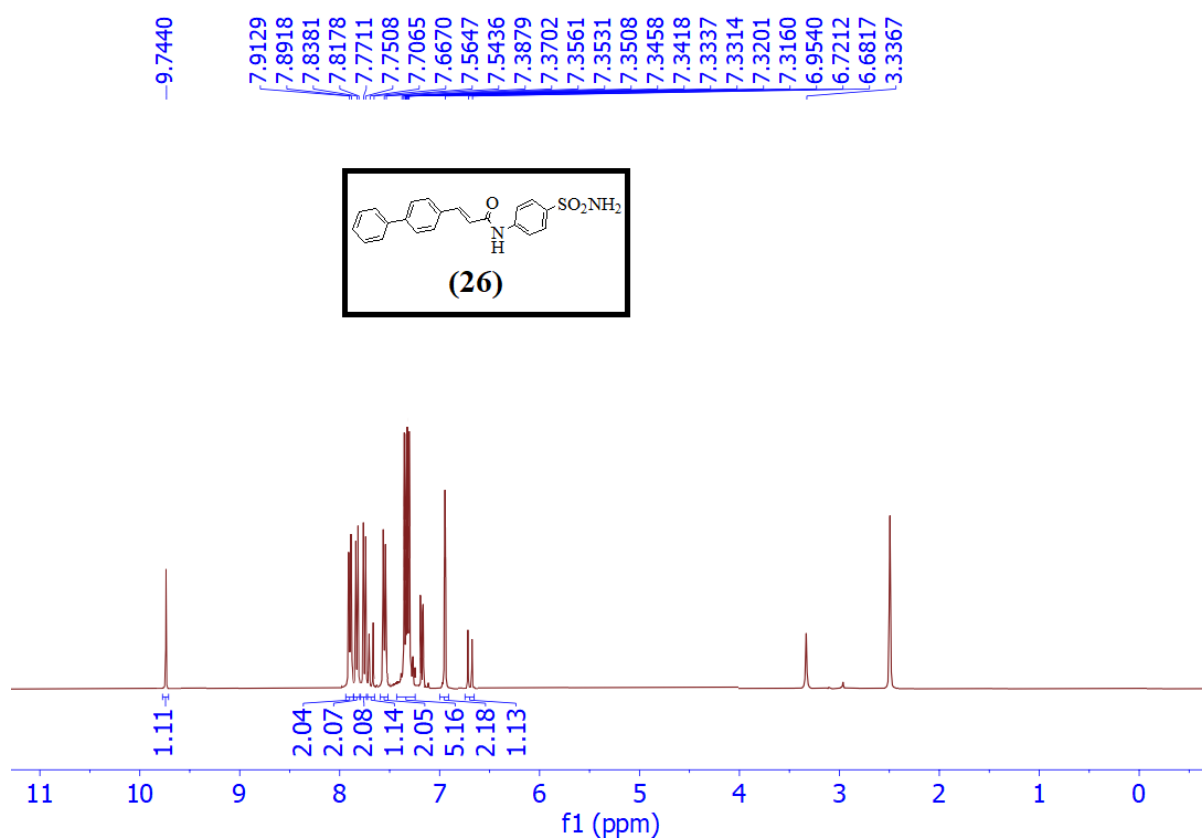

Figure S-31: <sup>1</sup>H NMR (400 MHz) spectrum of compound 26 in DMSO-*d*<sub>6</sub>

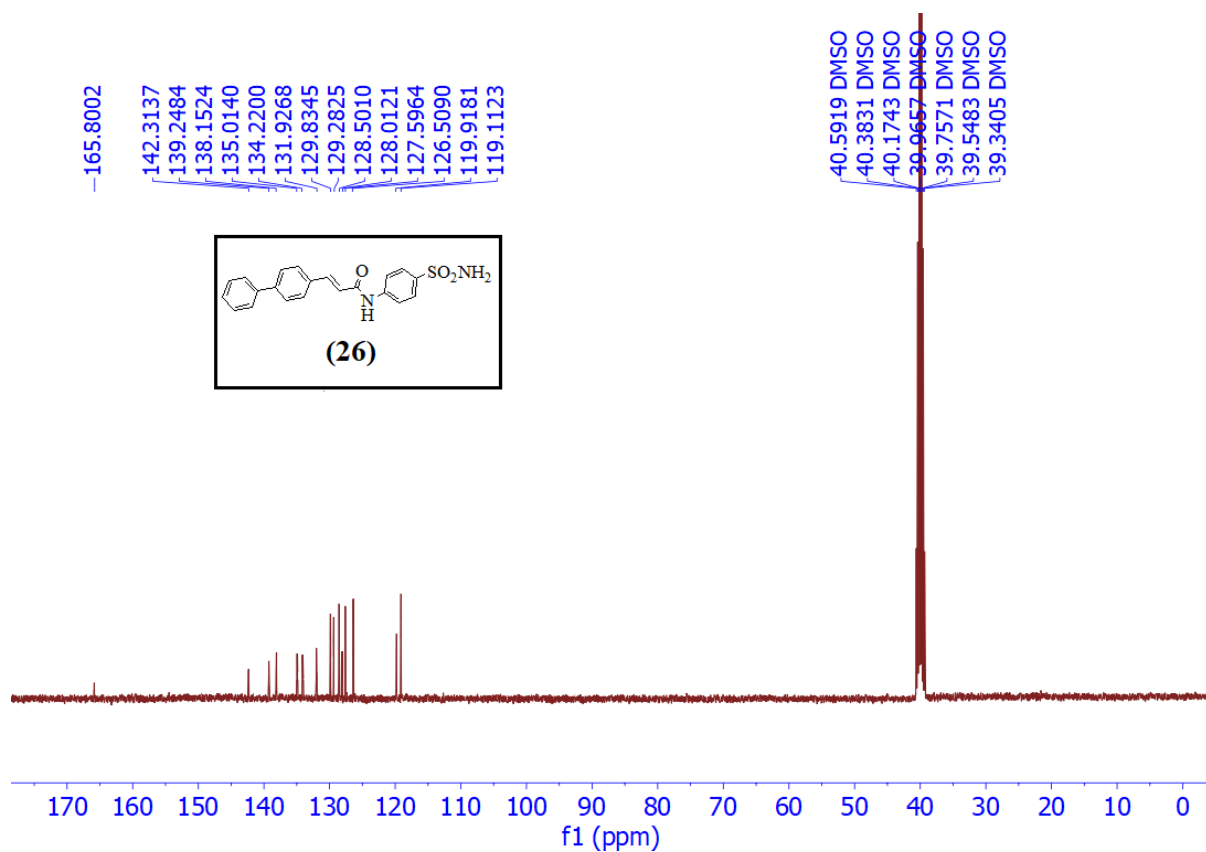

Figure S-32: <sup>13</sup>C NMR (100 MHz) spectrum of compound **26** in DMSO-*d*<sub>6</sub>

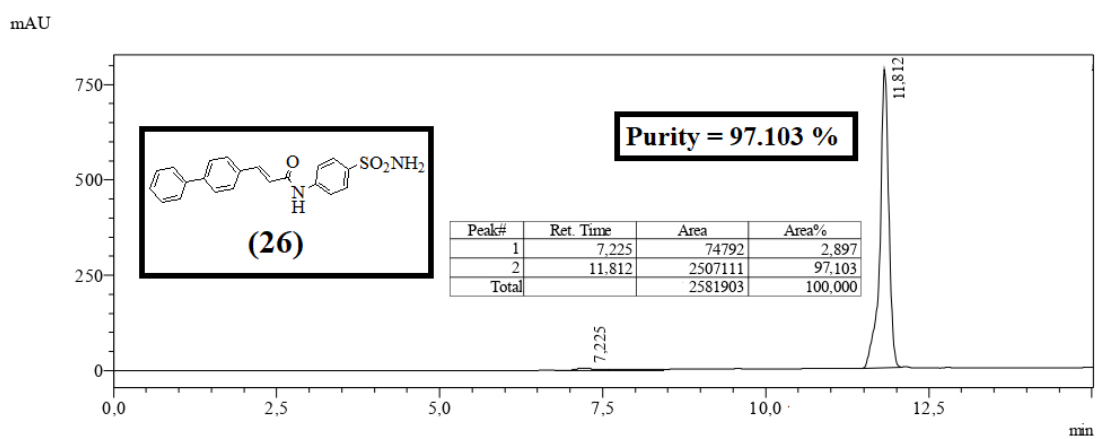

Figure S-33: HPLC Chromatogram of compound **26**

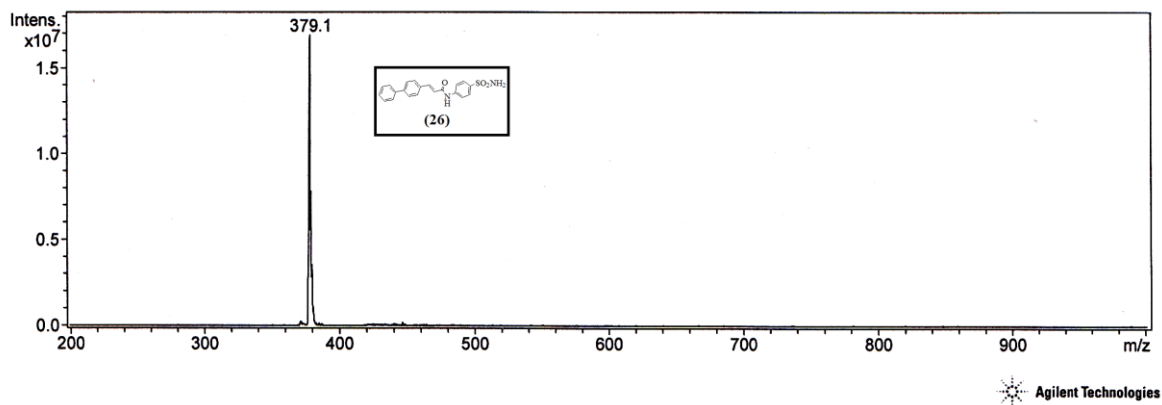

Figure S-34: LC-MS Chromatogram of compound **26**

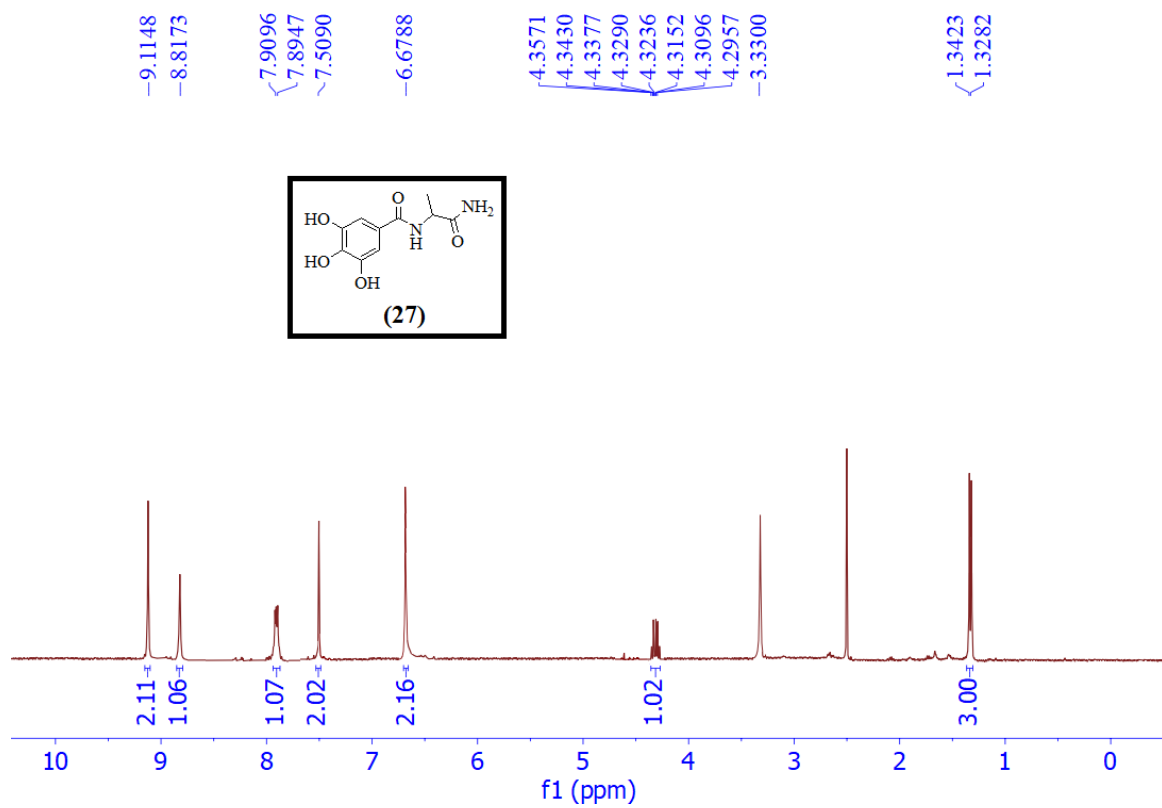

Figure S-35:  $^1\text{H}$  NMR (400 MHz) spectrum of compound **27** in  $\text{DMSO-}d_6$

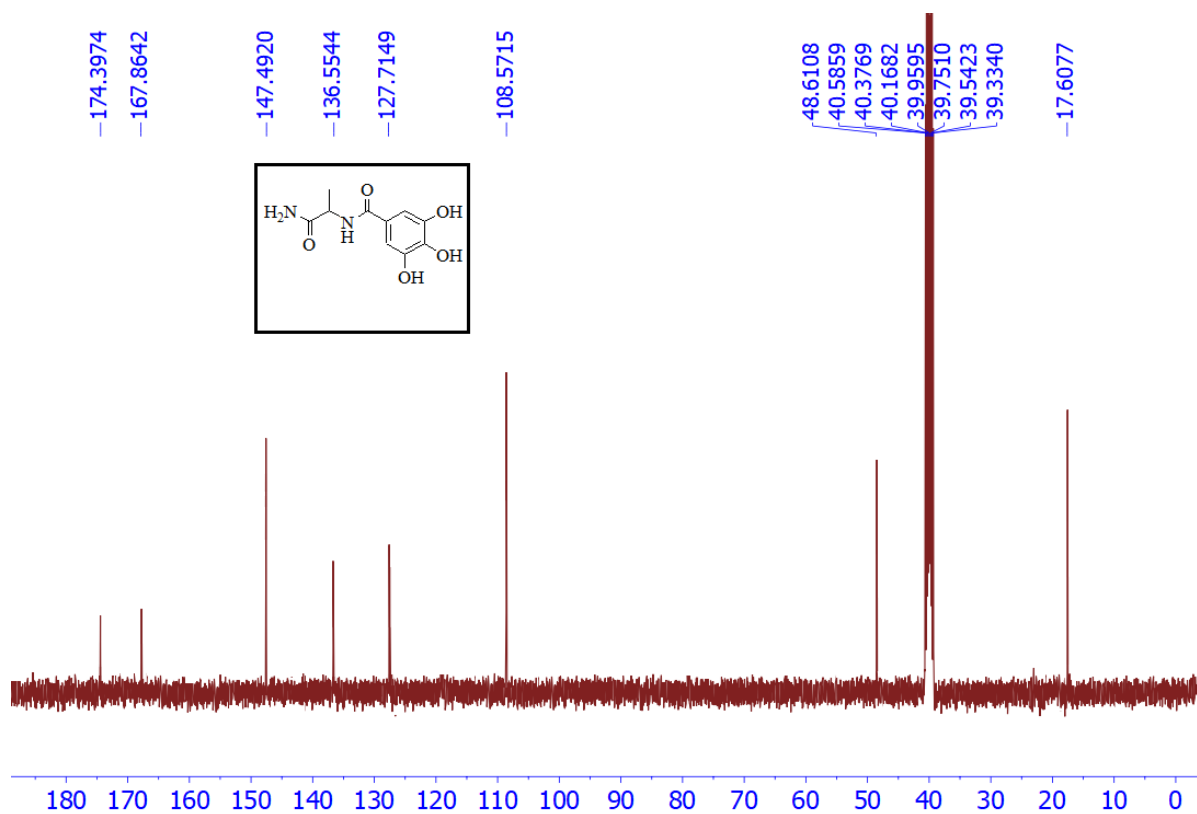

**Figure S-36:**  $^{13}\text{C}$  NMR (100 MHz) spectrum of compound **27** in  $\text{DMSO-}d_6$



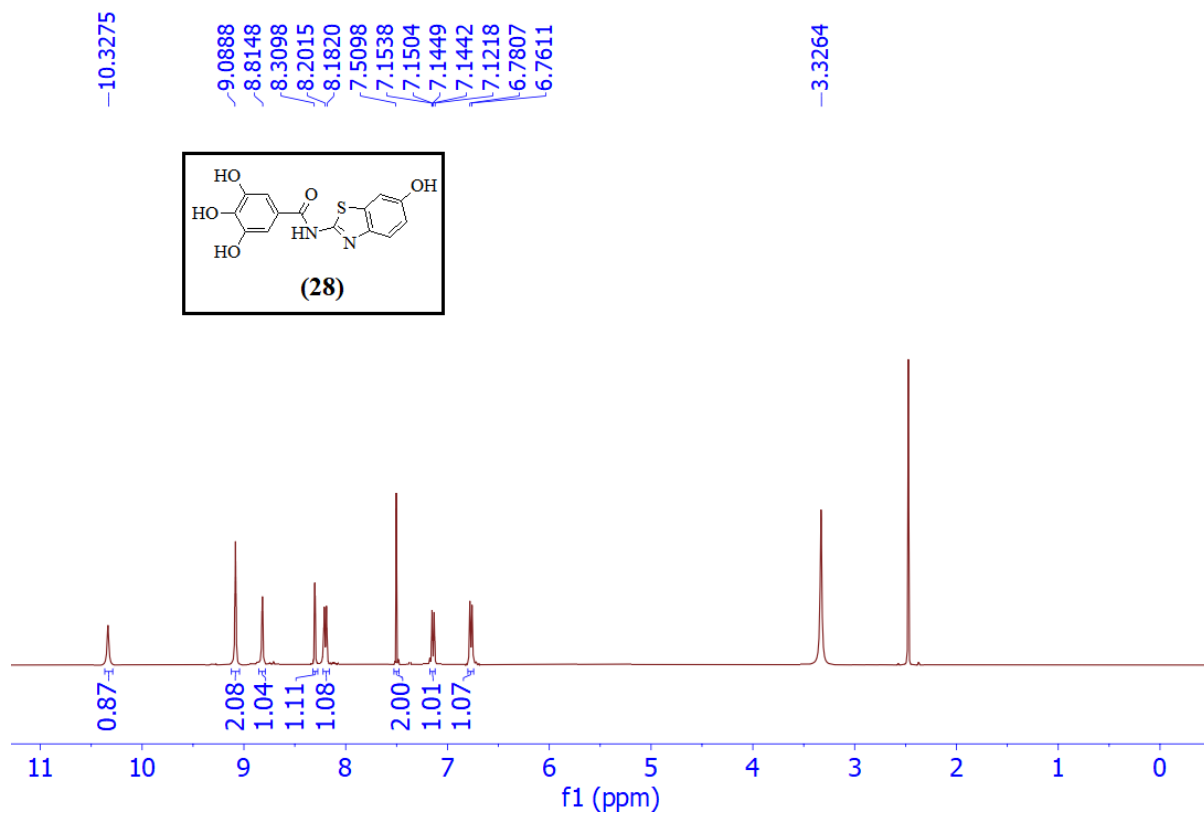

**Figure S-37:**  $^1\text{H}$  NMR (400 MHz) spectrum of compound **28** in  $\text{DMSO-}d_6$

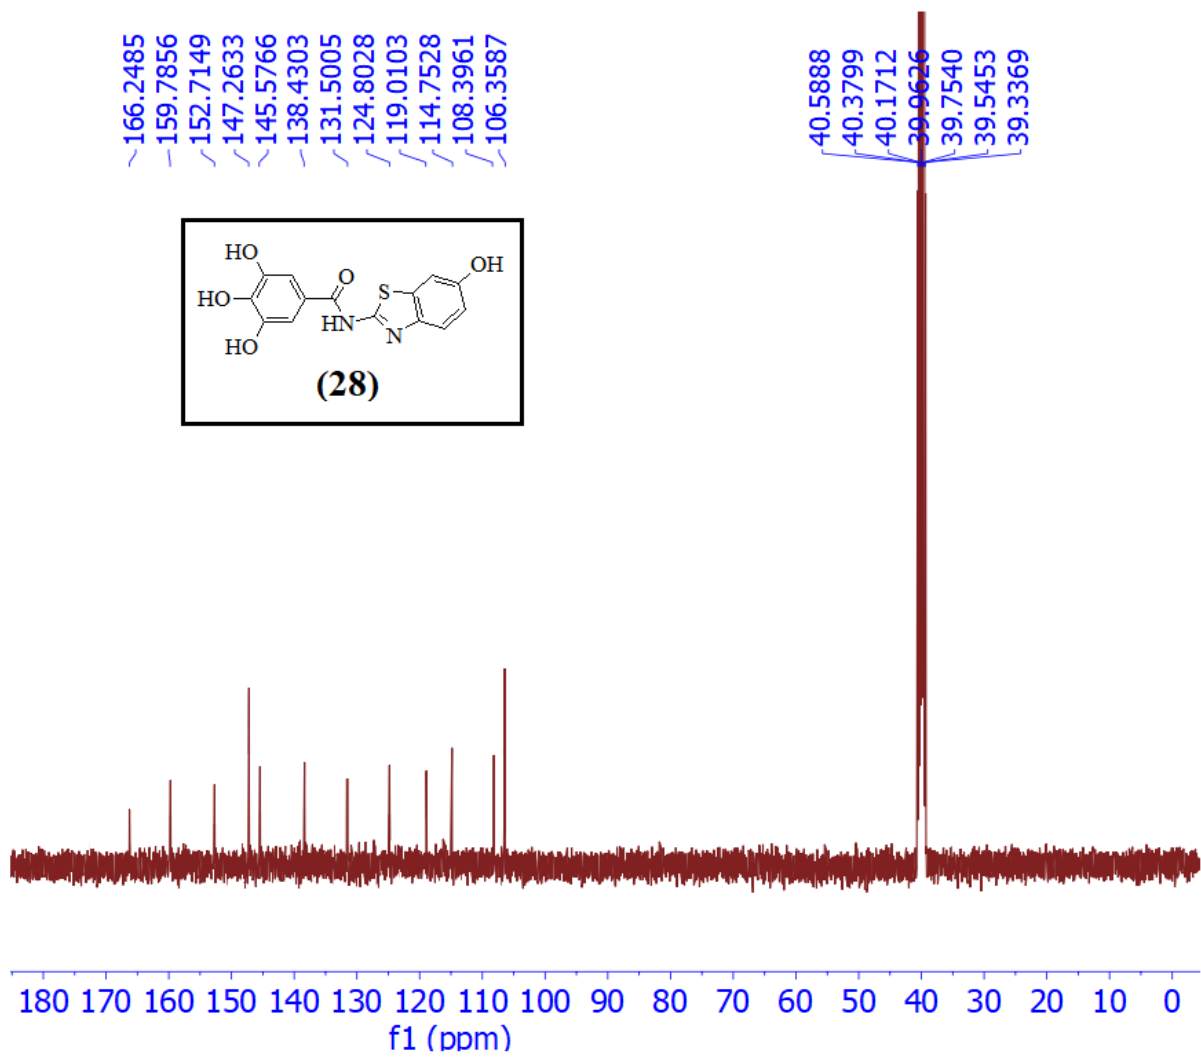

**Figure S-38:**  $^{13}\text{C}$  NMR (100 MHz) spectrum of compound **28** in DMSO

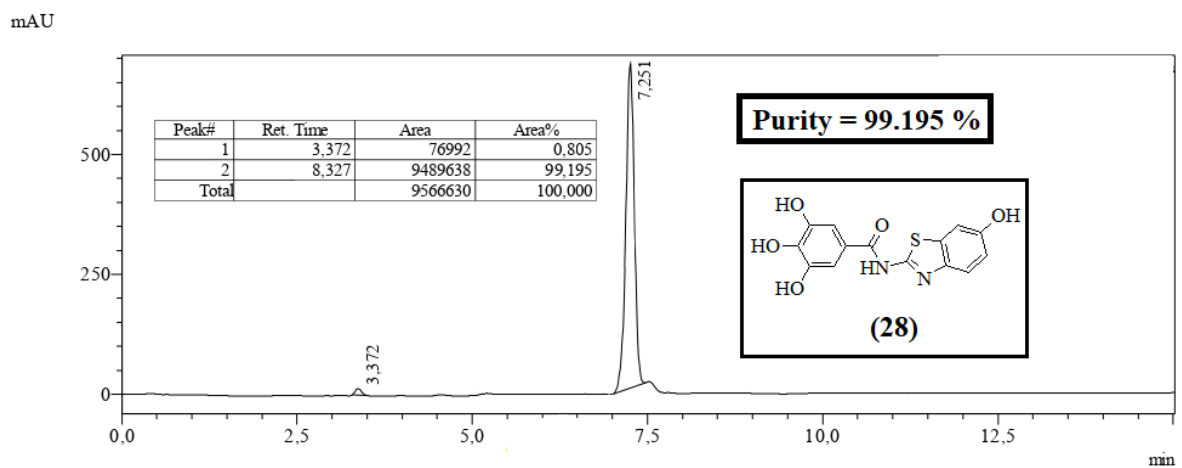

**Figure S-39:** HPLC Chromatogram of compound **28**

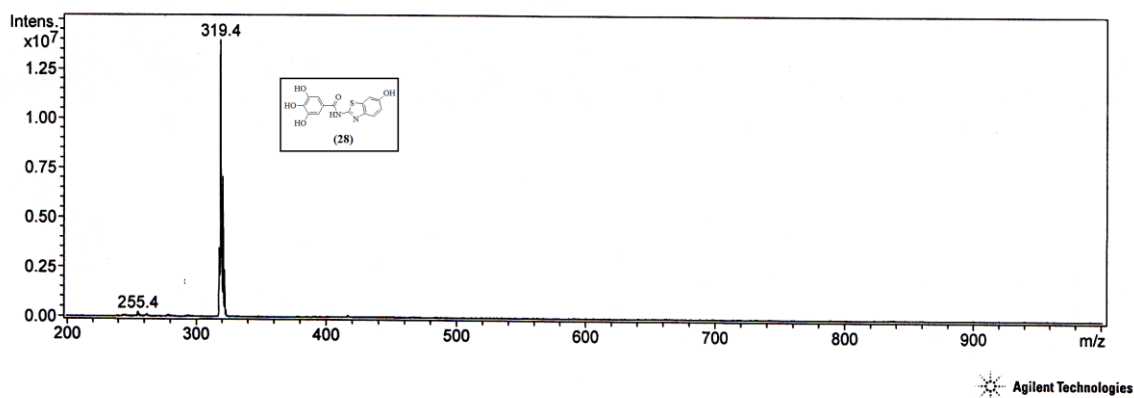

Figure S-40: LC-MS Chromatogram of compound 28

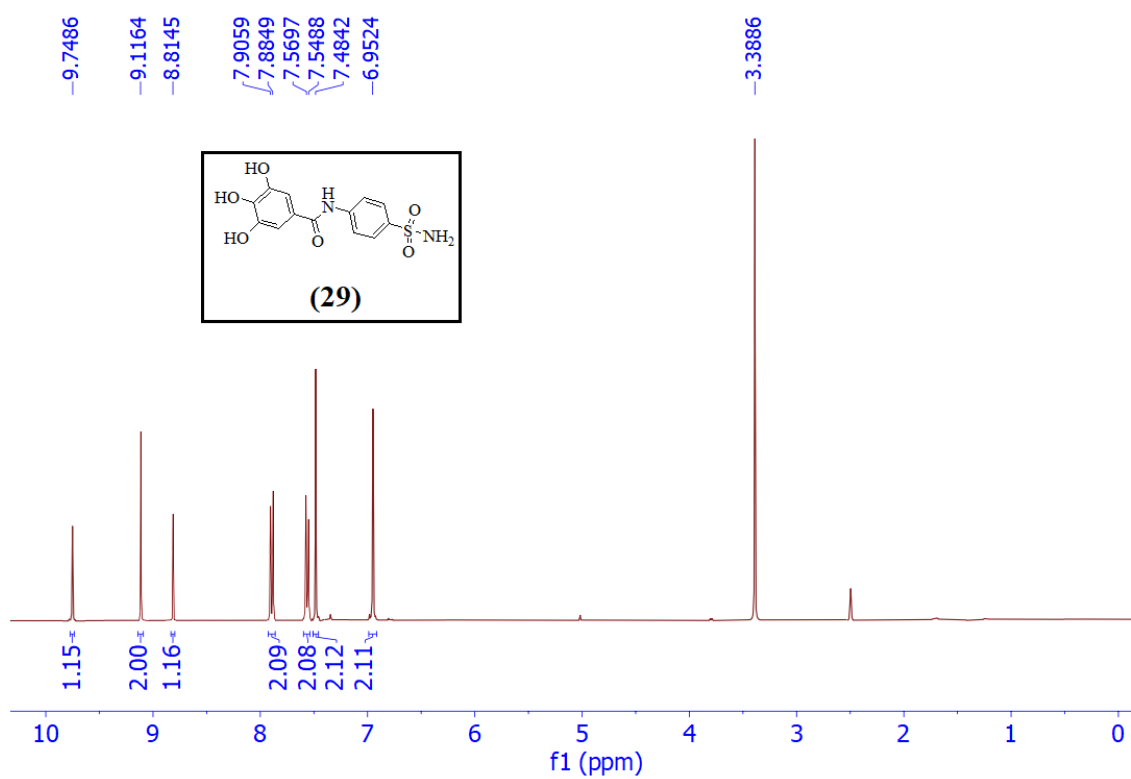

Figure S-41: <sup>1</sup>H NMR (400 MHz) spectrum of compound 29 in DMSO-*d*<sub>6</sub>

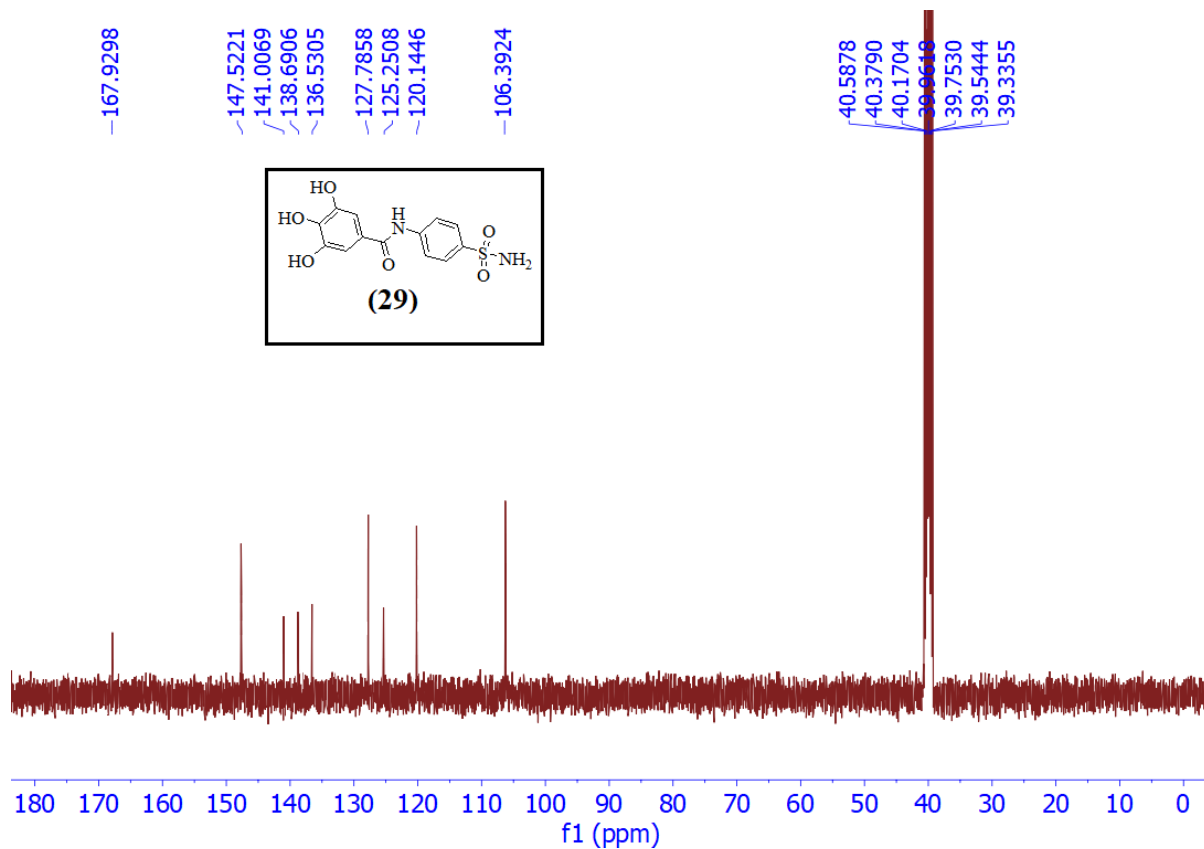

Figure S-42:  $^{13}\text{C}$  NMR (100 MHz) spectrum of compound **29** in  $\text{DMSO-}d_6$

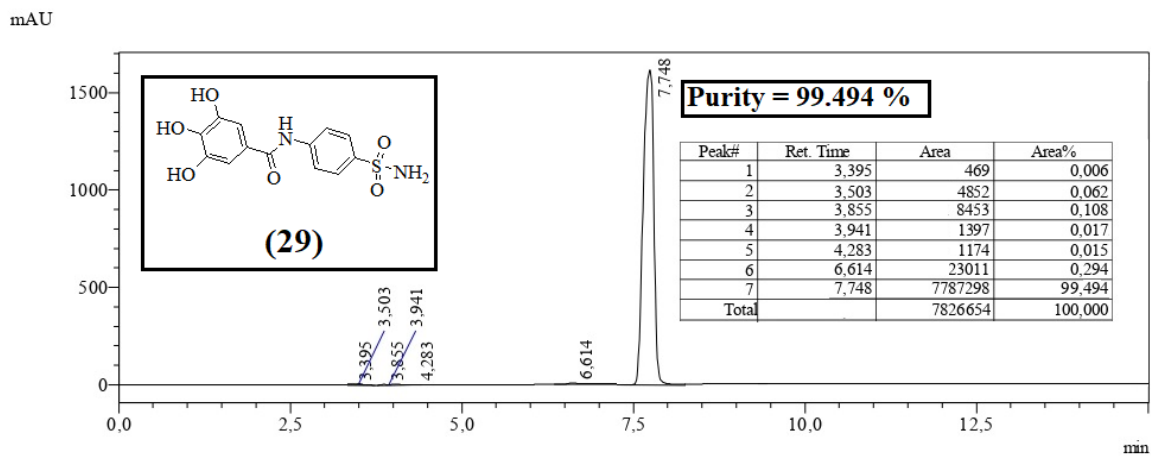

Figure S-43: HPLC Chromatogram of compound **29**
